# Supplementary material
Source: PubMed Central journal article supplement (PMC6130361)
Supplement: pnas.1807982115.sapp.pdf [file pnas.1807982115.sapp.pdf]

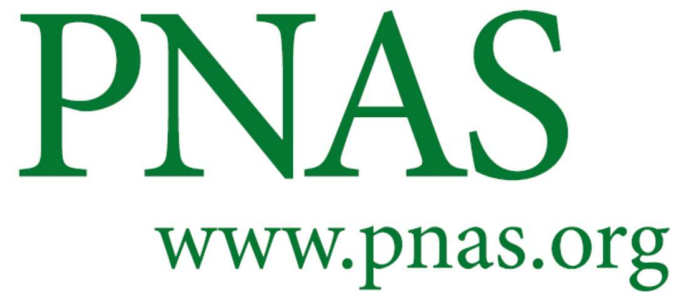

## Supplementary Information for

Selective Permeability of Mouse Blood-Aqueous Barrier as Determined by  
 $^{15}\text{N}$ -Heavy Isotope Tracing and Mass Spectrometry

Pan Liu, Benjamin R. Thomson, Natalia Khalatyan, Liang Feng, Xiaorong Liu, Jeffrey N. Savas, Susan E. Quaggin, and Jing Jin

Jing Jin

Email: [jing.jin@northwestern.edu](mailto:jing.jin@northwestern.edu)

### **This PDF file includes:**

Supplementary Materials and Methods

Figs. S1 to S8

Tables S1

References for SI reference citations

## Supplementary Materials and Methods

### Mass spectrometry

The peptides were dissolved in 20uL of Buffer A (94.785% H<sub>2</sub>O, 5% ACN, 0.125% FA) and quantified using Micro BCA Protein Assay. 3 ug were loaded with Easy nLC 1200 onto nanoViper C18 trap column (0.075mm x 2cm). Following a 2 hour gradient with increasing Buffer B (99.875% ACN, 0.125% FA) concentration, peptides eluted from the NanoViper analytical column (0.075mm x 50cm) were electrosprayed with 2,000V from the stainless steel emitter tip on the Nanospray Flex Ion Source. Each sample was analyzed on the Orbitrap Fusion Tribrid mass spectrometer. MS parameters were as follows: ion transfer tube temp = 300°C, Easy-IC internal mass calibration, default charge state = 2. Detector type set to Orbitrap, with 60K resolution, wide quad isolation, mass range = normal, scan range = 300-1500 m/z. Max injection time = 50 ms, AGC target = 200,000, microscans = 1, S-lens RF level = 60. Without source fragmentation, datatype = positive and centroid, MIPS was on, included charge states = 2-6 (reject unassigned). Dynamic exclusion enabled with n = 1. Precursor selection decision = most intense, top 20, isolation window = 1.6, scan range = auto normal, first mass = 110, collision energy 30%, CID, Deterctor type = ion trap, max injection time = 75 ms, AGC target = 10,000, inject ions for all available parallelizable time.

### Spectra analysis, protein quantification

Protein identification, quantification, and analysis were done using Integrated Proteomics Pipeline (IP2). The raw files were extracted to MS1 and MS2 spectra using RawConverter (<http://fields.scripps.edu/downloads.php>) and ProLuCID searched against the RefSeq mouse dataset on IP2. Basic parameters of 50 ppm precursor mass tolerance and 600 ppm for fragmented ions were used. Searches were filtered with DTaselect containing one peptide per protein, at least one tryptic end and unlimited missed cleavages of a minimum of 6 amino acid, with a false discovery rate (FDR) < 0.001, fixed modification of +57.02146Da on cysteine residues, and all precursor mass within 10 ppm of expected. To estimate peptide FDRs accurately, target/decoy database was used containing the reversed sequences of all the proteins appended to the target database(1). After the matches were filtered, the protein FDRs were below 1% for each sample analysis. With IDCompare, measurements of abundance were generated across all samples, such as peptide count, NSAF and empAI. Searches were done for combined light and heavy peptides and Census quantified(2).

To calculate the <sup>15</sup>N/<sup>14</sup>N peptide ion intensity, the ProLuCID results were used to reconstruct MS1 ion chromatograms in the m/z range that included both the heavy and light peptide (*SI Appendix*, Fig. S1) using the Census software(3). Calculating the elemental compositions and corresponding isotopic distribution for the heavy and light peptides determined the m/z range of the chromatogram. Using the MS1 files the chromatograms were generated that included both the labeled and unlabeled precursor peptides. The intensity ratios were then calculated per peptide using the reconstructed chromatogram. Census also allows for filtration of poor-quality peptide ratio measurements with a correlation coefficient (ranging between 0-1) that represents the quality of the correlation between the labeled and unlabeled chromatograms. In this analysis, the peptide ratios with correlation values greater than 0.5 were used. When more than two peptides were found for the same protein, Census used an outlier algorithm by calculating the SDs for the proteins. By applying the Grubbs test (*p* value < 0.01) the outliers were removed. With QuantCompare, the final peptide ratios were generated. For each protein, its heavy vs. light ratios were represented by the composite of all peptide ratios identified by MS that are assigned to the protein.

### Laser- and alkali burn-induced eye injury

Laser illumination and alkali burn was applied to inflict injuries to one of the two eyes of the subject mice (the <sup>15</sup>N-serum recipient mice). In brief, mice were anesthetized by an intraperitoneal injection of ketamine (100 mg/kg; Butler Schein Animal Health, Dublin, OH, USA) and xylazine (10 mg/kg; Lloyd, Inc., Iowa, Shenandoah, IA, USA), and a drop of 0.5% proparacaine hydrochloride (Thermo-Fisher) was applied to the corneal surface for local analgesia. Laser illumination (approximately 80 to 100 laser spots) was applied to the corneal limbus to photocoagulate its vascular plexus (details of the method described previously(4)). Two weeks after surgery to permit wound healing, the mice were subjected to infusion of <sup>15</sup>N-labeled serum. For alkali burn-induced corneal neovascularization study, mice were systemically and locally anesthetized as in laser illumination model. Filter papers of 2 mm in diameter were soaked with 1 M NaOH and placed on the central cornea for 30 seconds, followed by flushing the eyes twice with 10 mL PBS (more details in (5)). Two weeks after treatment, the mice were sacrificed and aqueous was collected for western blotting and eye tissues were collected for imaging.

### **Vascular imaging**

The method for whole mount imaging of the corneal vascular plexus was published previously(6, 7). Briefly, following the extraction of the aqueous, eyes were immersion fixed in 4% paraformaldehyde for overnight. The hemispheres were then dissected and mounted onto glass slide to be stained with CD31 (R&D Systems) for confocal imaging.

### **Western blotting**

Aqueous (2 µL) and serum (0.5 µL) samples were resolved by 4–12% SDS-PAGE and transferred to PVDF membrane. The membrane was blocked with 5% non-fat milk for 1 hour at room temperature, and then probed with complement factor H/CFH antibody (R&D Systems) or complement factor B/CFB antibody (Novus Biologicals) followed by HRP-conjugated secondary antibodies. The membrane was developed using the Clarity™ ECL substrate (Bio-Rad Laboratories).

A Peptide "TCVADESAANCDK" of Albumin:  
m/z: 720.79 / 728.27 ( $^{14}\text{N}/^{15}\text{N}$ )

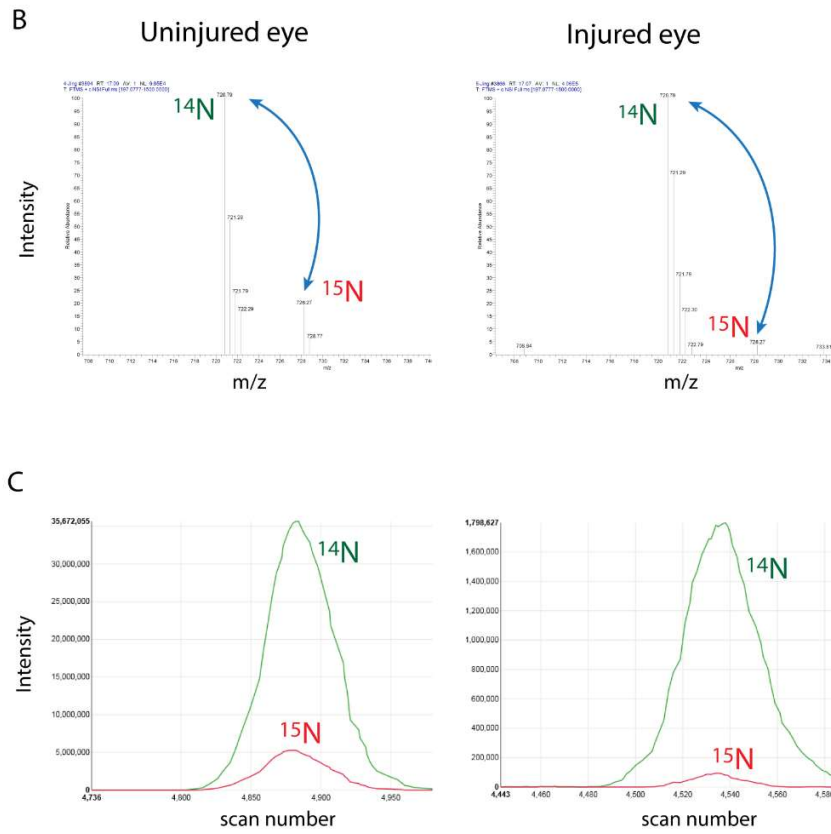

**Fig. S1. Relative quantification of  $^{15}\text{N}$ -labeled proteins by reconstructed MS1 chromatograms.** A. Tryptic Albumin peptide sequence. B. MS1 spectra of the Albumin peptide with heavy  $^{15}\text{N}$  and light  $^{14}\text{N}$  atoms. C. Relative quantification was based on area-under-curve values of reconstructed chromatograms.

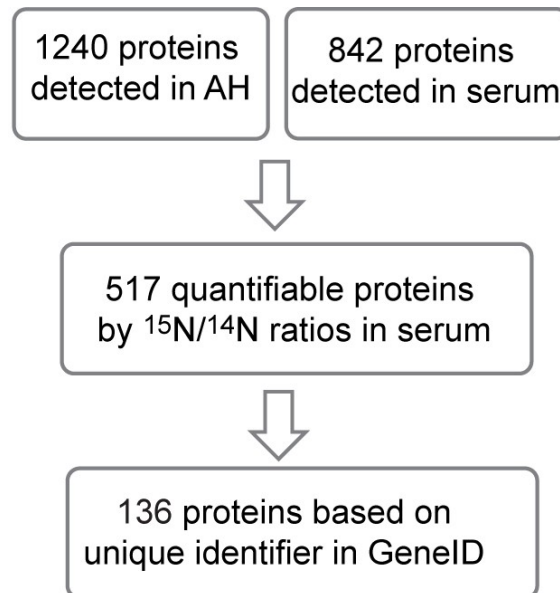

**Fig. S2. The total numbers of proteins measured in aqueous and in serum.** Middle box: Proteins showing both <sup>15</sup>N and <sup>14</sup>N signals (serum extracted at the 15 min time point) were analyzed, of which a manually annotated non-redundant set of 136 proteins were followed up (bottom box).

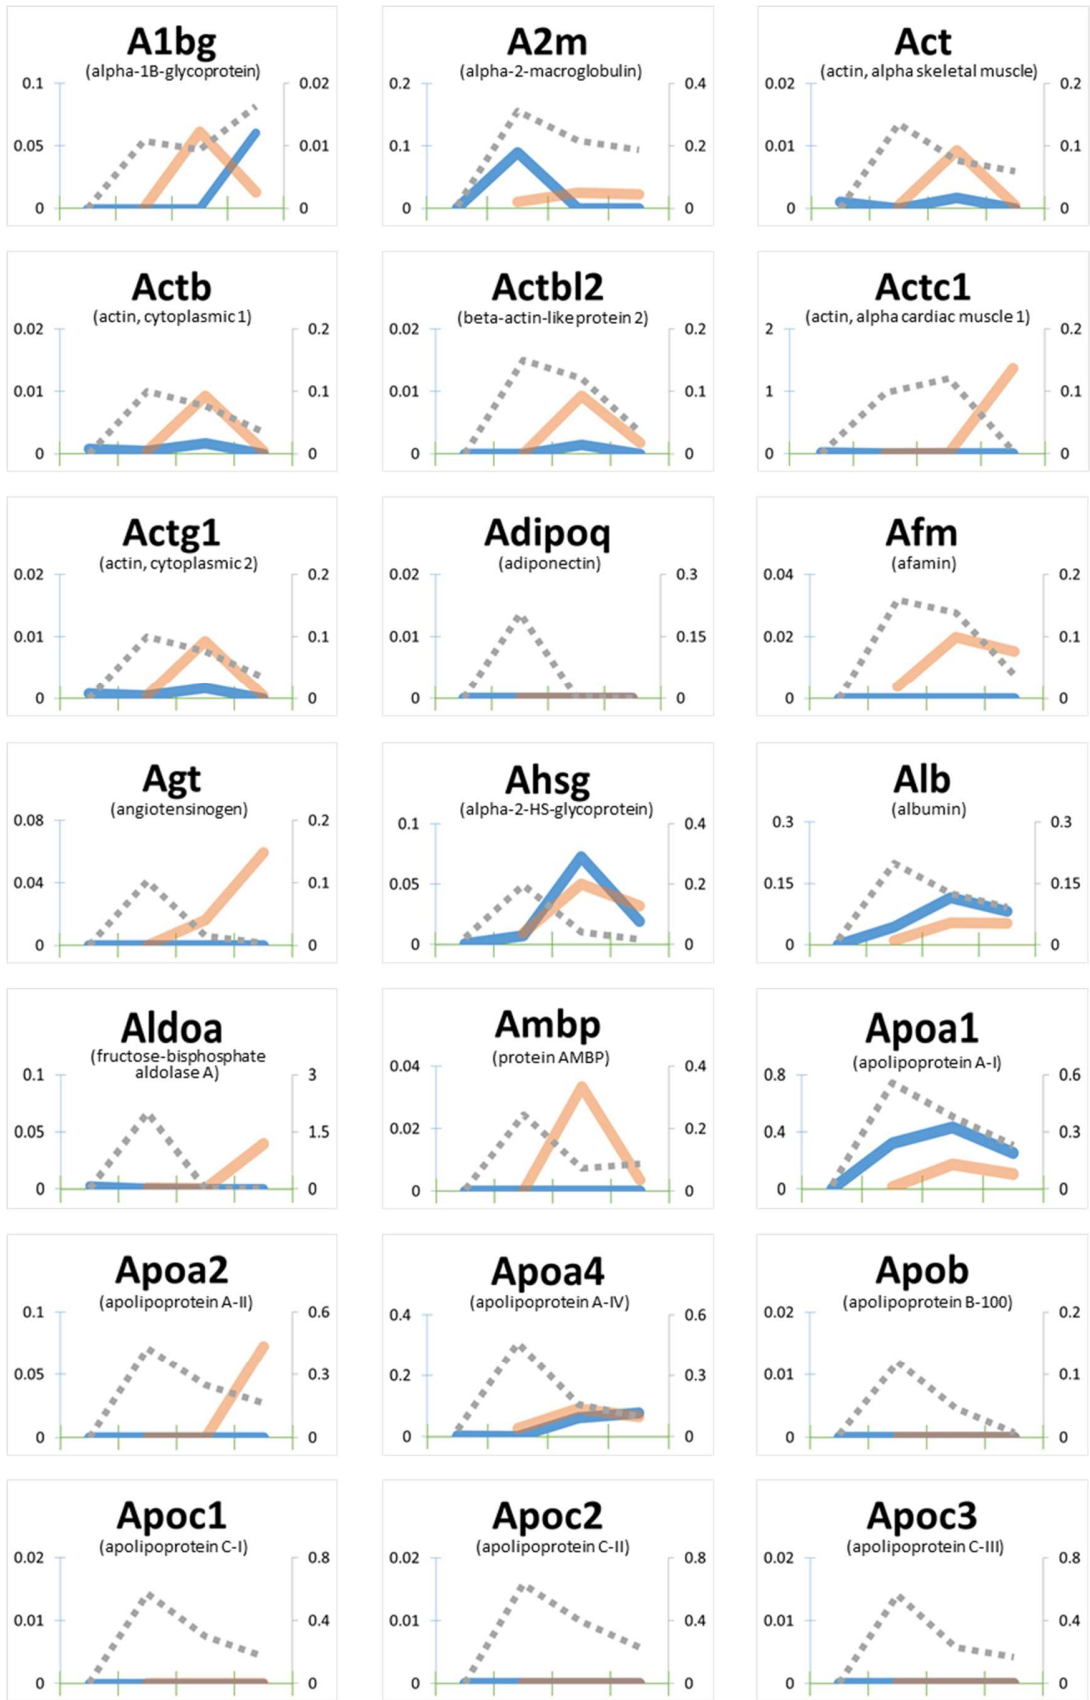

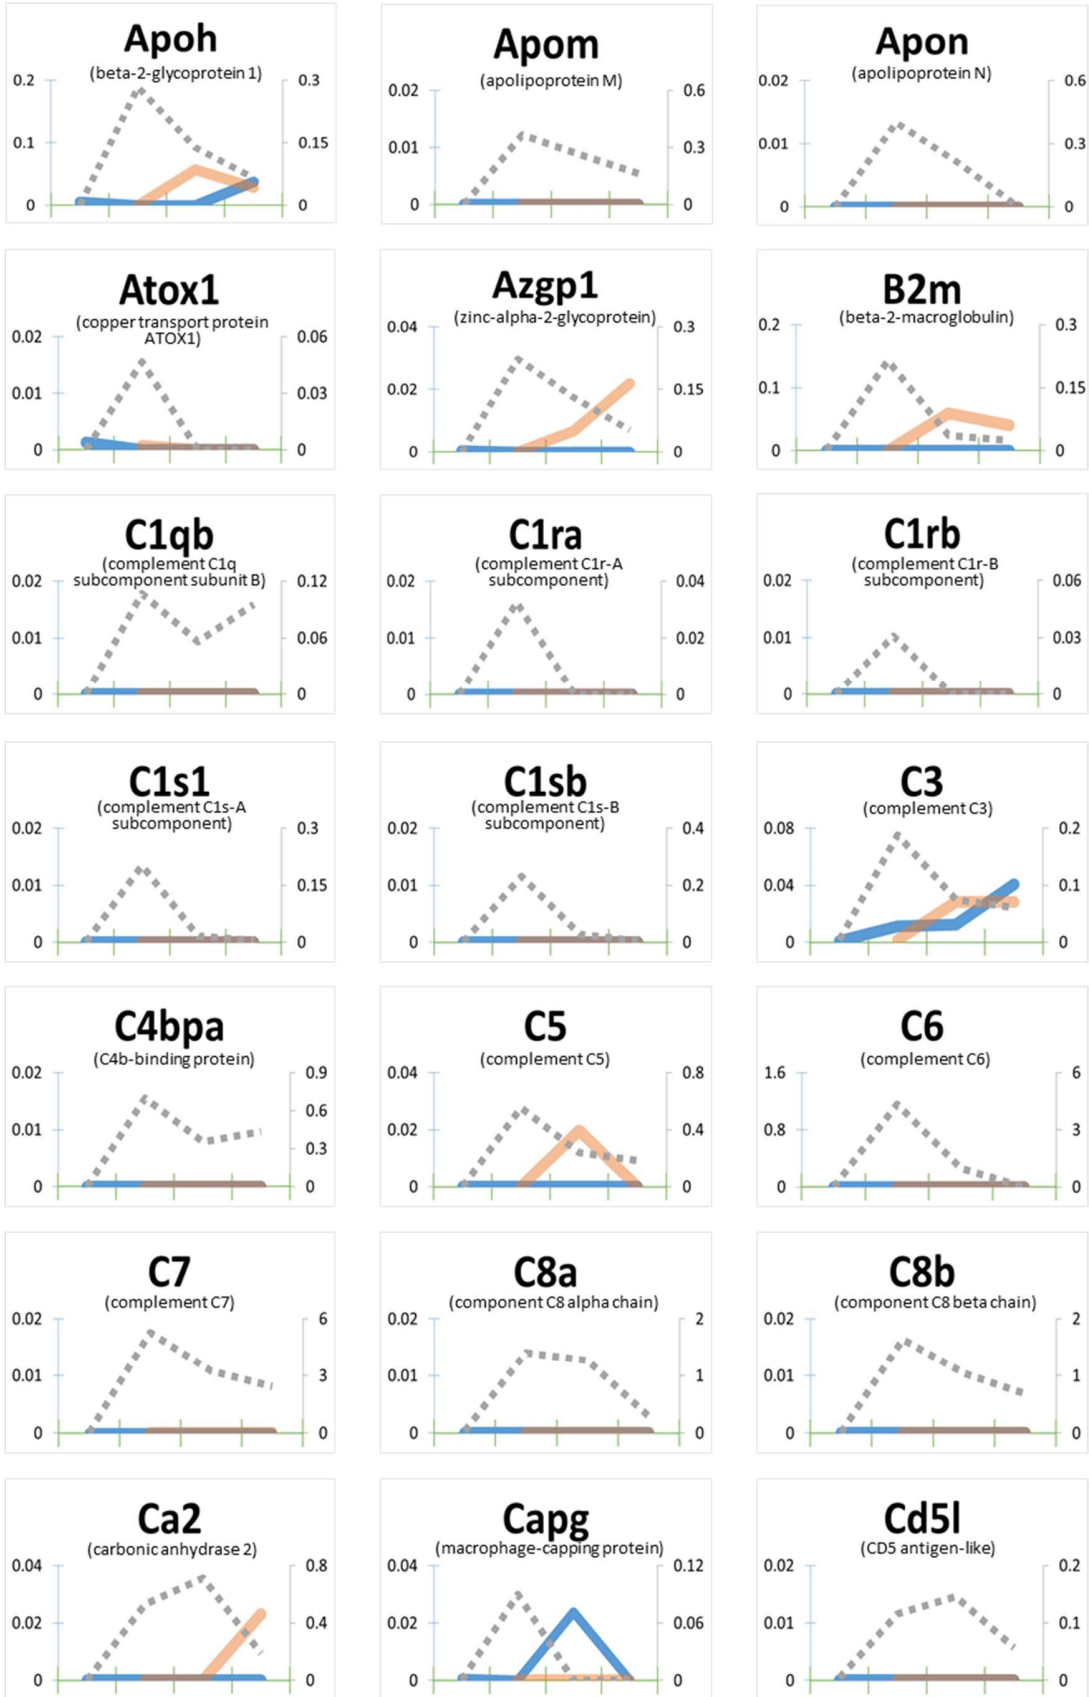

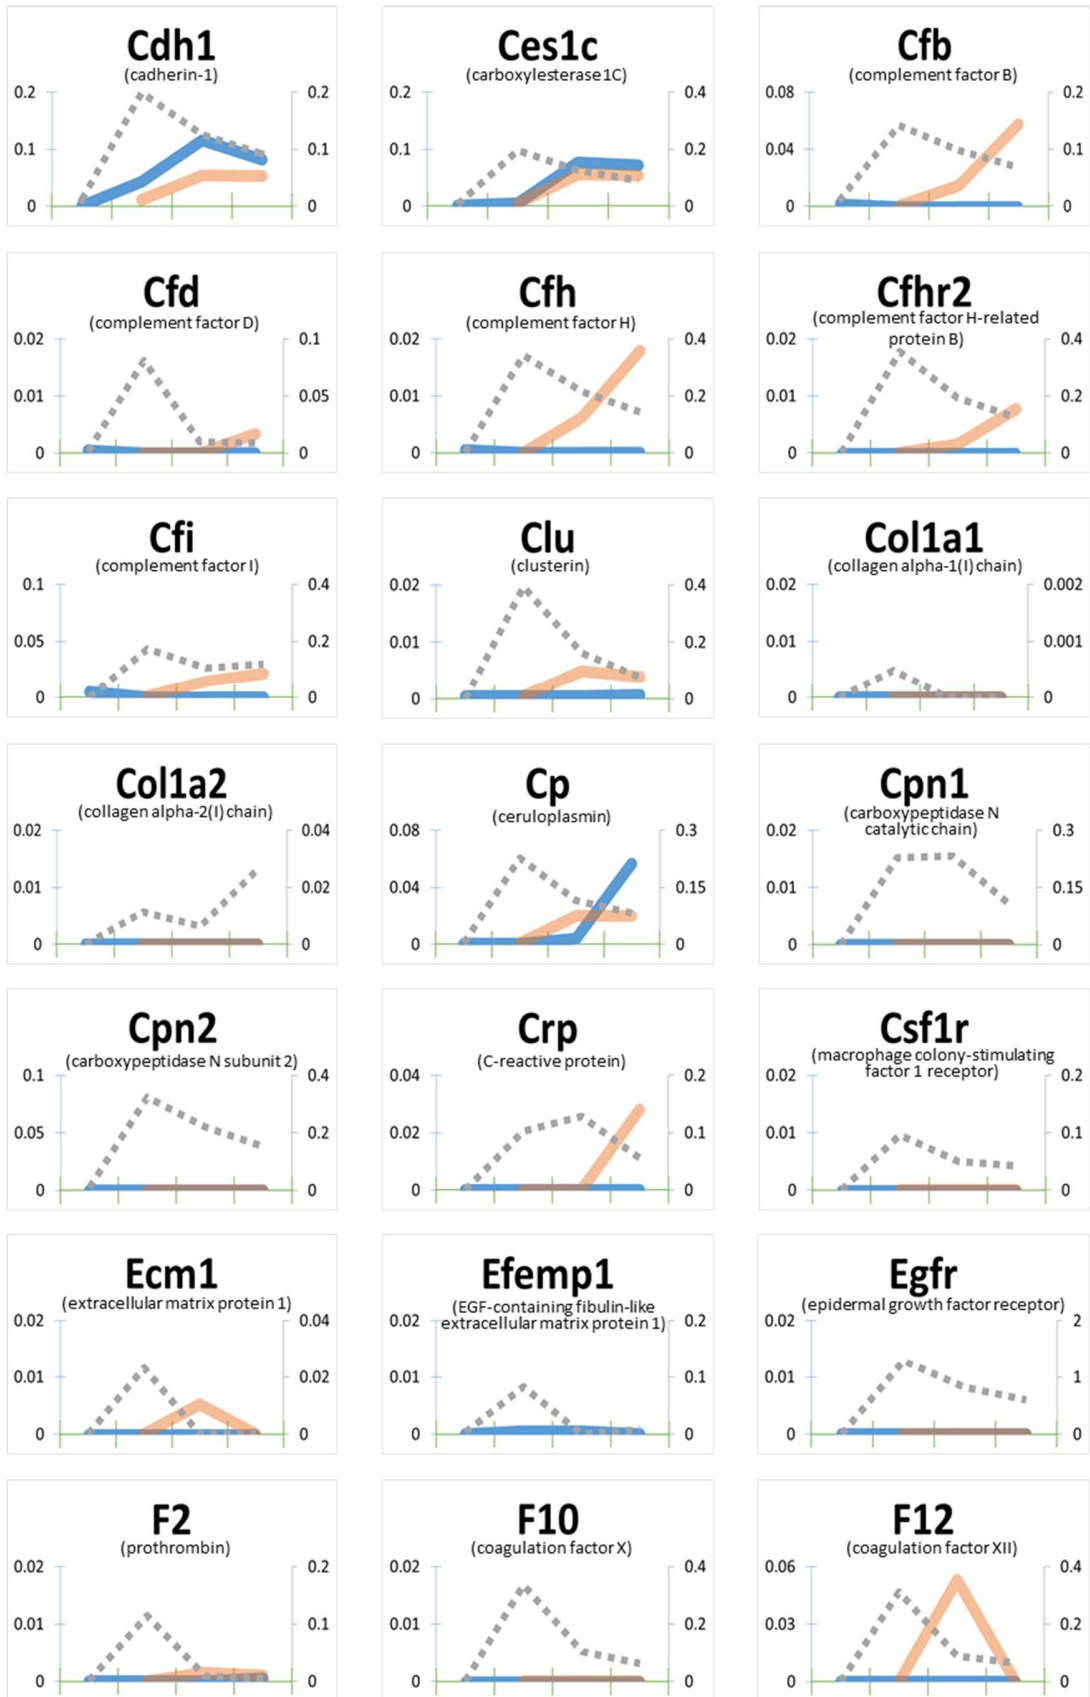



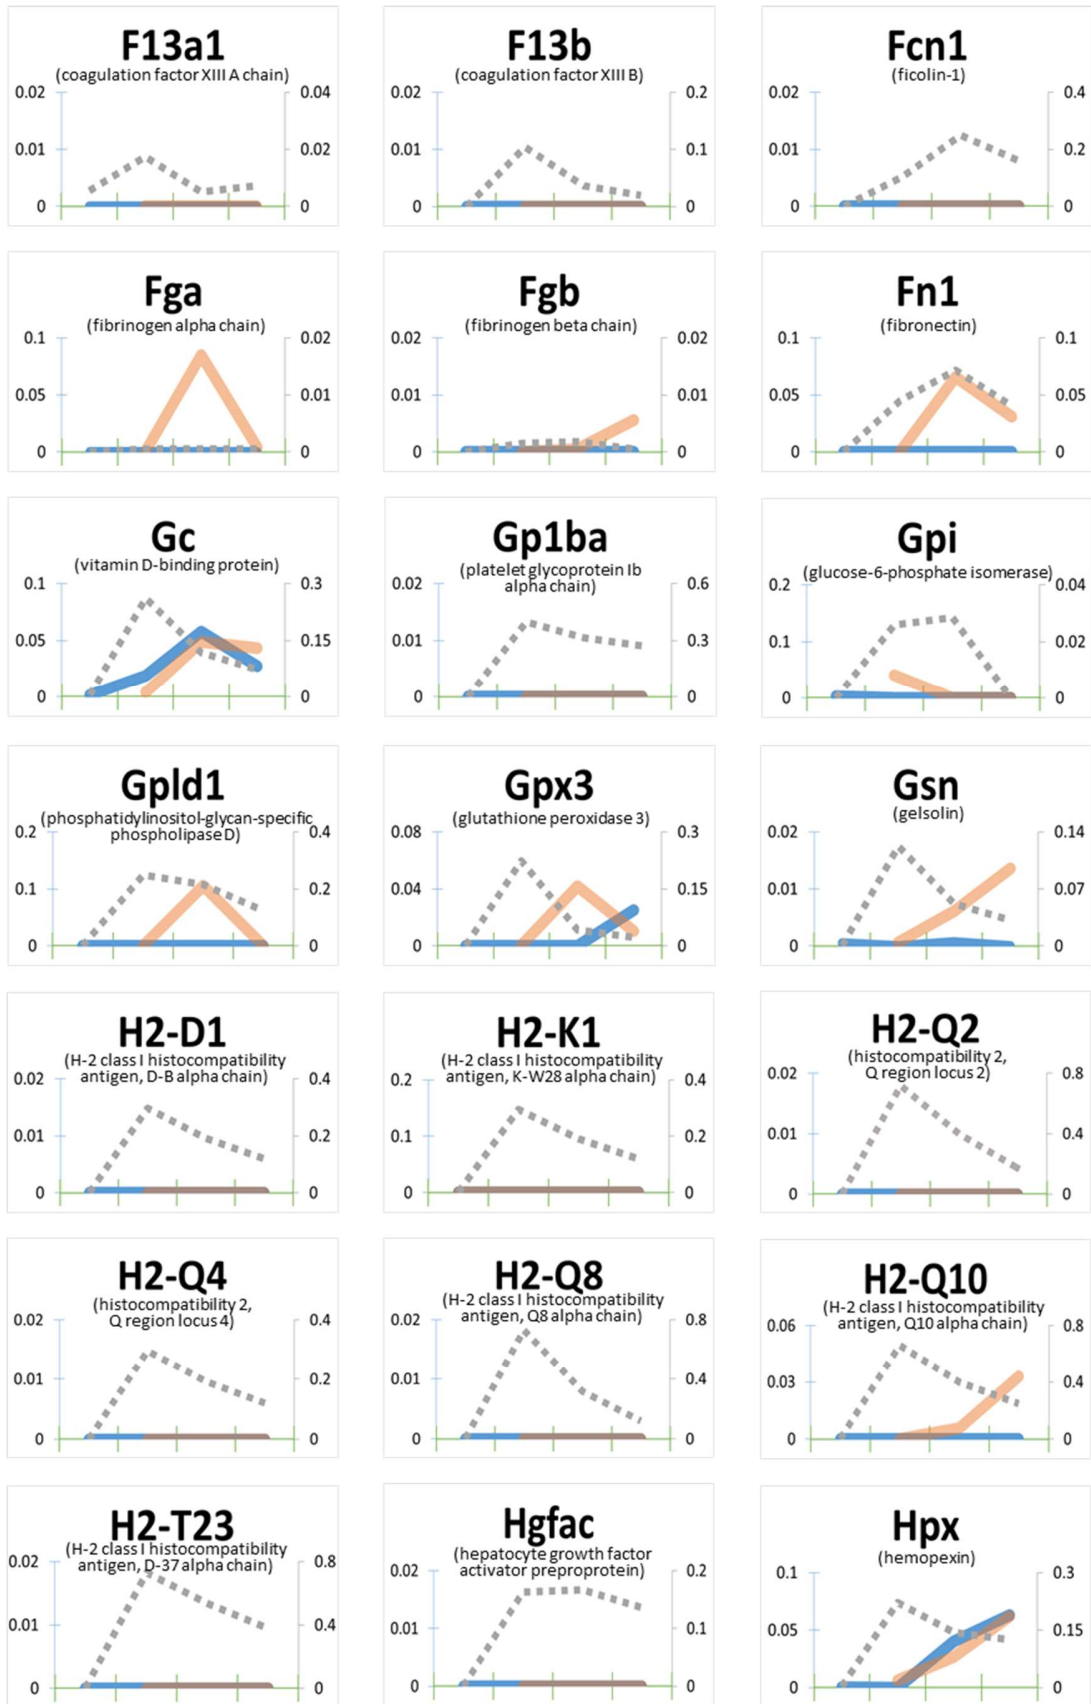

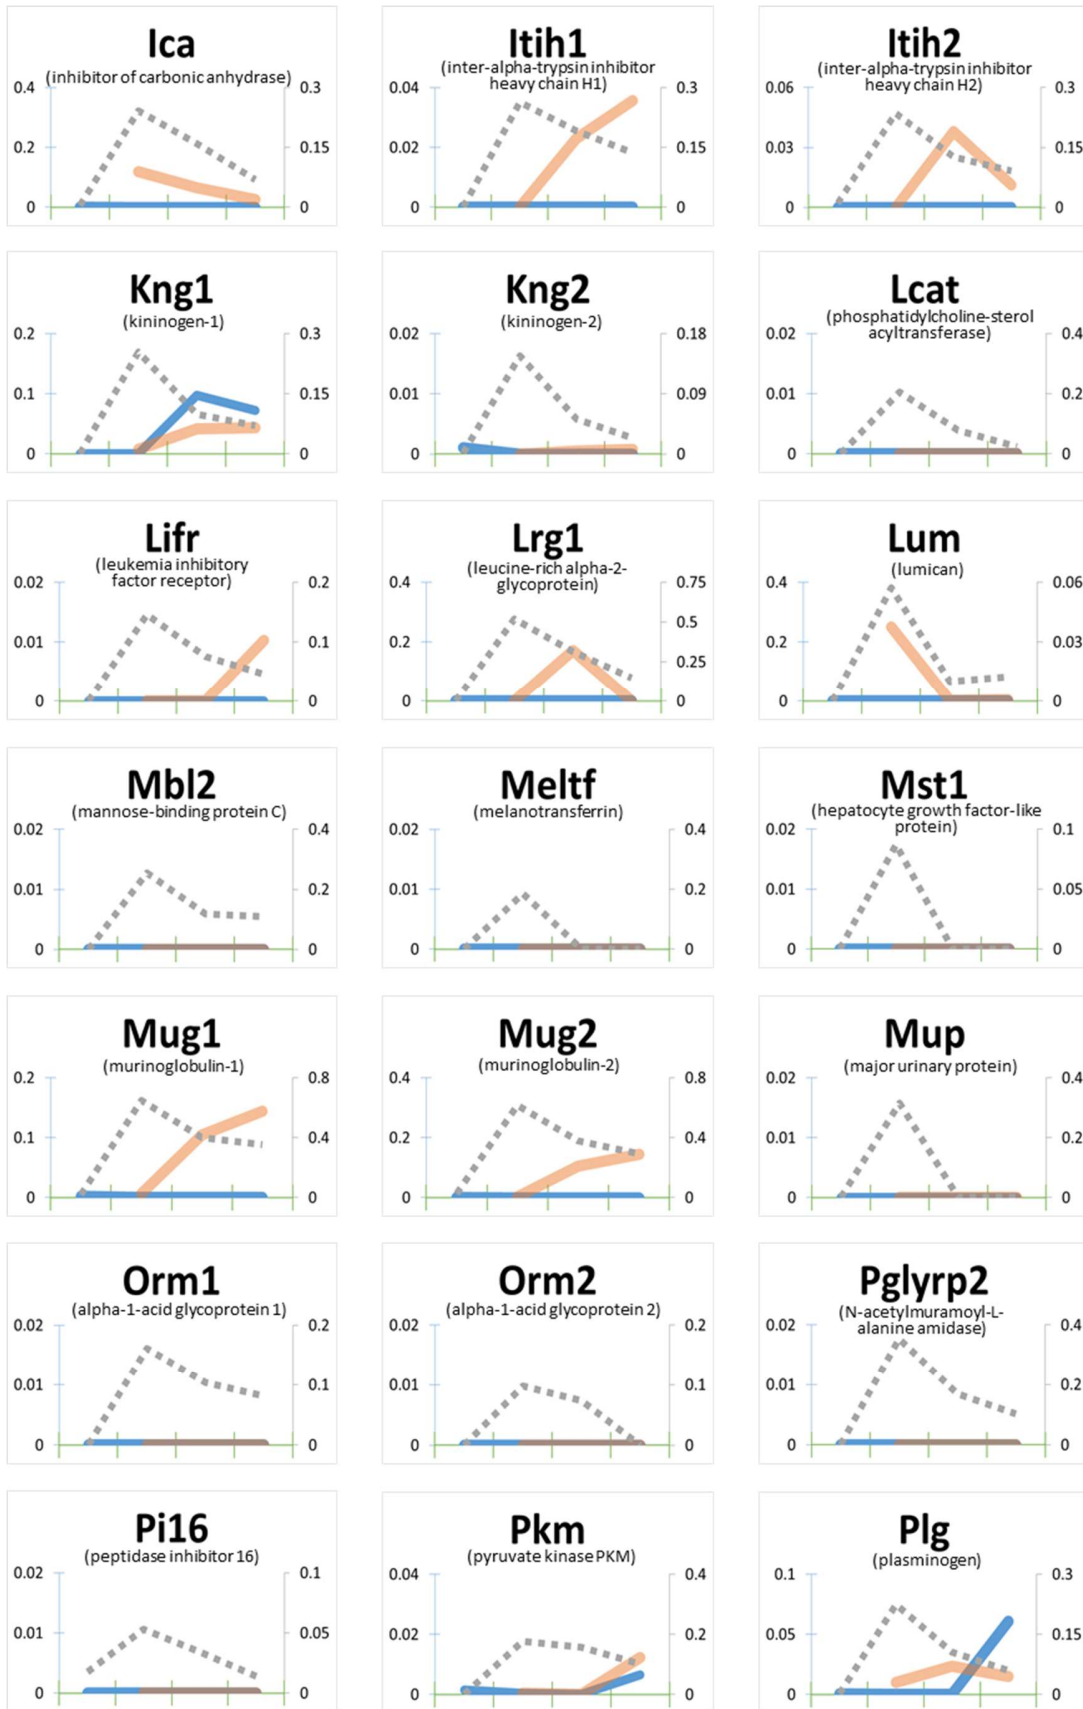

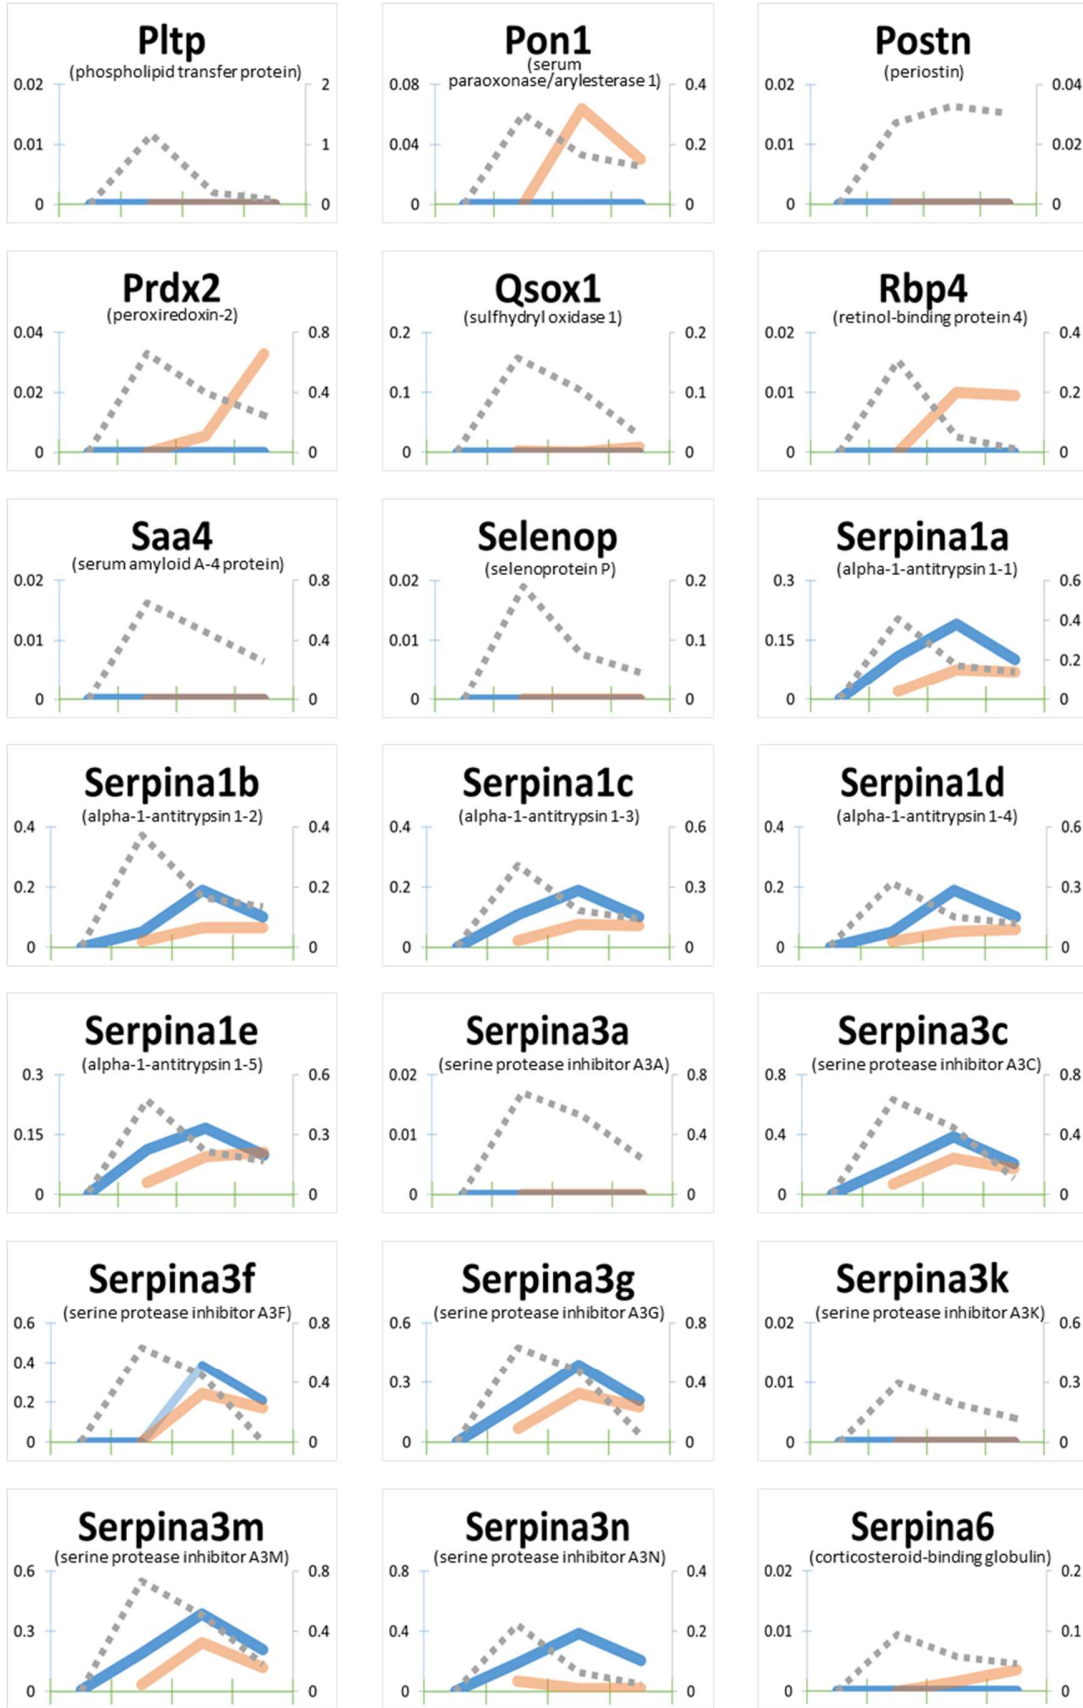

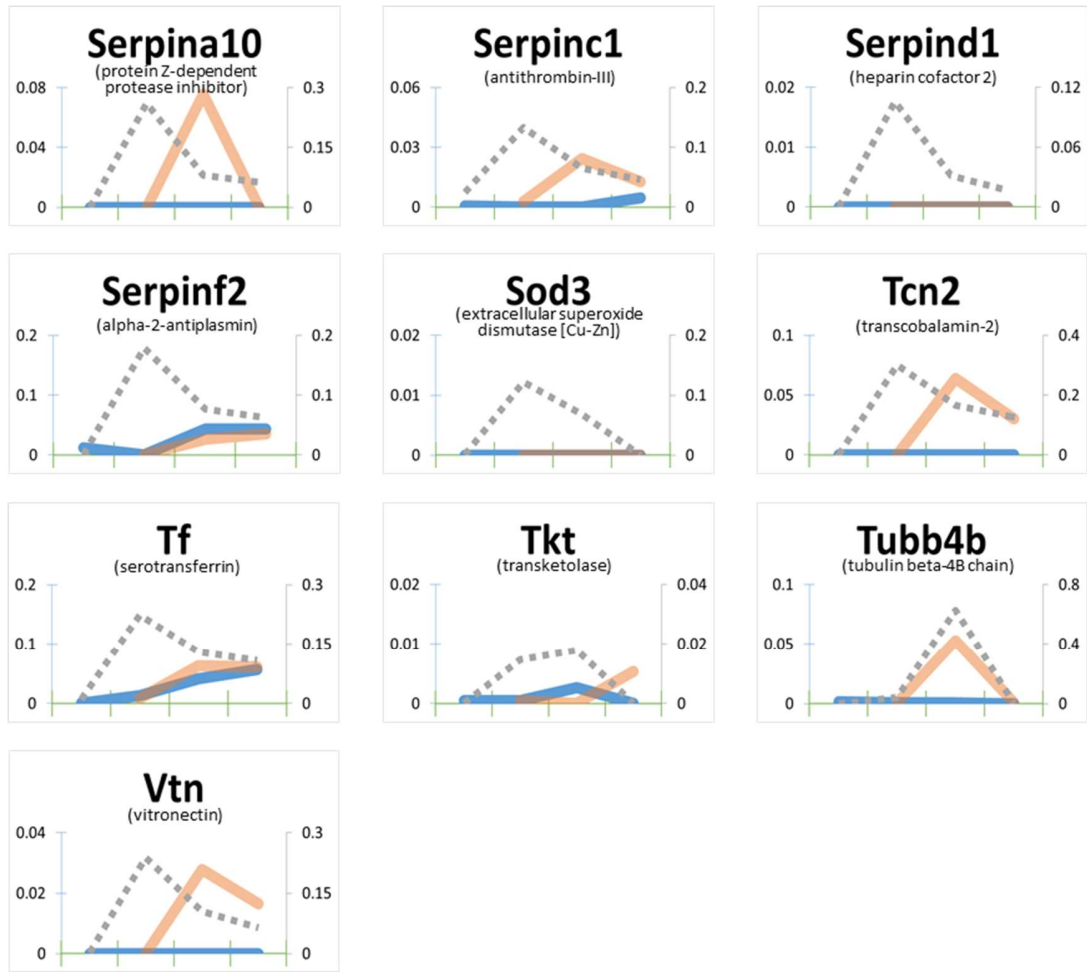

**Fig. S3. Aqueous  $^{15}\text{N}/^{14}\text{N}$  ratios of 136 serum proteins.** As in Figure 4A, the x-axis shows time points of 0, 15min, 2hr and 5hr; the y-axis shows  $^{15}\text{N}/^{14}\text{N}$  ratios (left scale for aqueous; right scale for serum). Gray dotted line: ratio in serum; blue line: ratio in normal eye; orange line: ratio in injured eye.

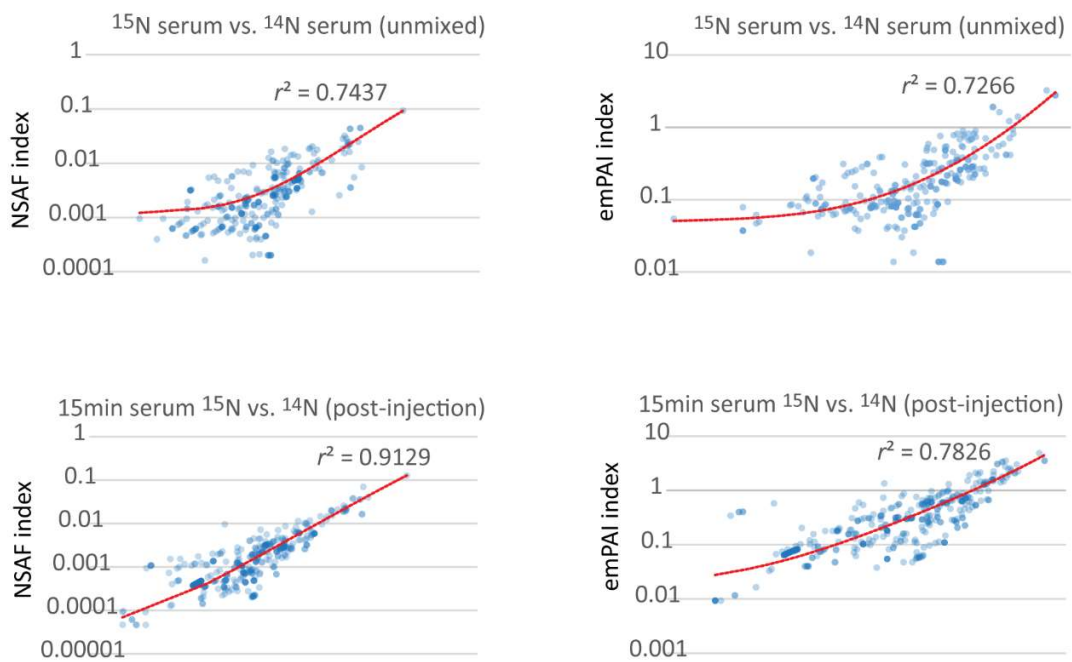

**Fig. S4. Comparison of MS parameters for protein quantification.** The x-axis direction is for  $^{15}\text{N}/^{14}\text{N}$  ratios calculated based on under the curve area from reconstructed chromatogram. The y-axes values are either NSAF or emPAI as indicated. The  $r^2$  values represent correlation coefficient between x- vs. y- axis.

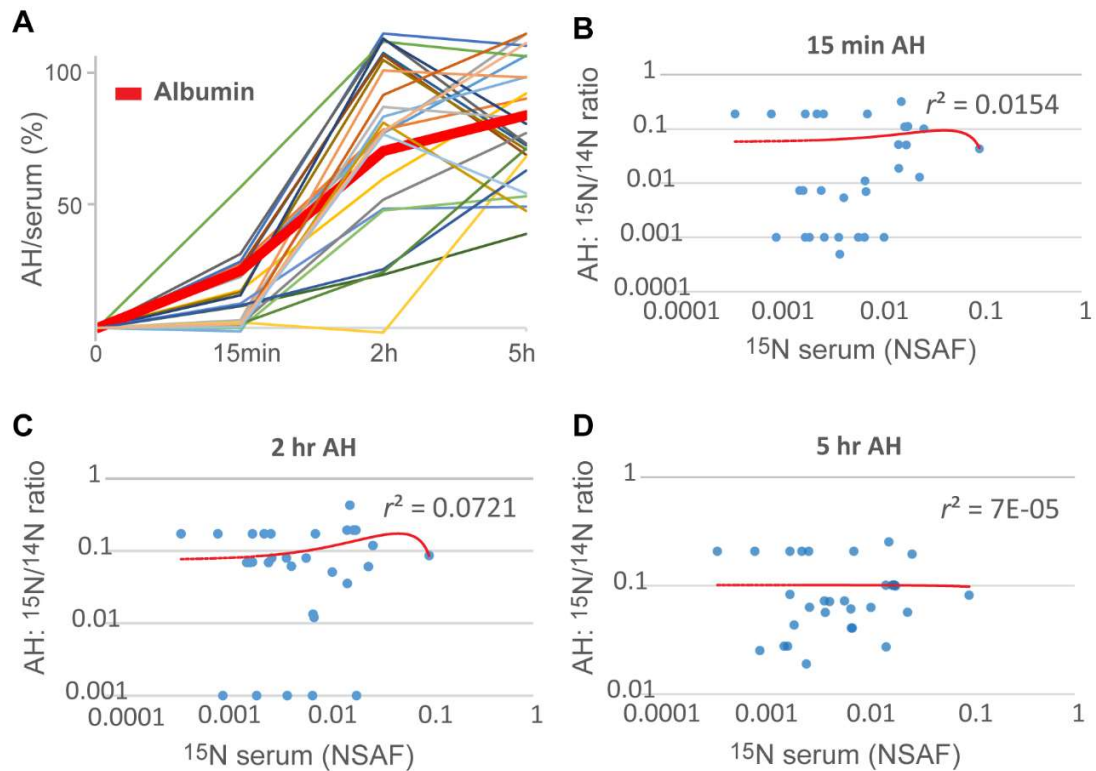

**Fig. S5. Time-dependent accumulation of  $^{15}\text{N}$ -labeled proteins in aqueous.** A. Using  $^{15}\text{N}/^{14}\text{N}$  ratios in serum as the benchmark (arbitrarily adjusted to as 100% on y-axis) for each time point, the aqueous  $^{15}\text{N}/^{14}\text{N}$  ratios relative to the corresponding serum benchmarks were calculated. As a representative example, Albumin (the highlighted red line) in the aqueous reached 70-80% of its serum levels 1 hour after injection of  $^{15}\text{N}$ -labeled serum. B-D. No overall correlation between serum abundance (x-axis: quantified using label-free NSAF indices of  $^{15}\text{N}$ -labeled proteins in serum.) and the aqueous  $^{15}\text{N}/^{14}\text{N}$  ratio (y-axis)—correlation coefficient  $r^2 > 0.95$  is considered as positive correlation.

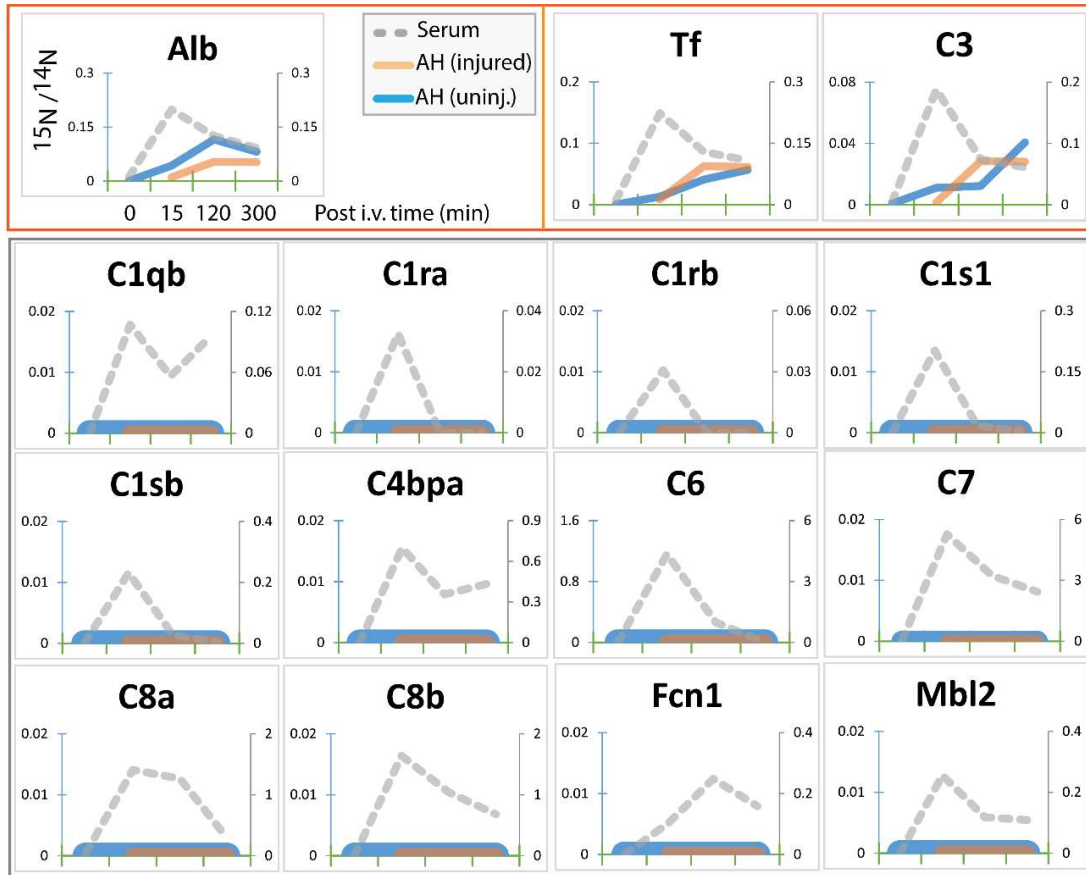

**Fig. S6. Serum and aqueous  $^{15}\text{N}/^{14}\text{N}$  ratios of complement proteins.** This figure is related to Figure 4A showing a separate set of proteins, mostly complement proteins that did not enter normal or injured eyes. From the top: The orange color boxes contain proteins that entered aqueous of both injured and uninjured eyes (legends shown with the example of Albumin, Transferrin/Tf and C3; left scale for aqueous  $^{15}\text{N}/^{14}\text{N}$  ratios and the right scale for serum. The black color box contains proteins that did not cross the barrier regardless of injury status, despite that the labeled fractions (measured as  $^{15}\text{N}/^{14}\text{N}$ ) could be detected in serum.



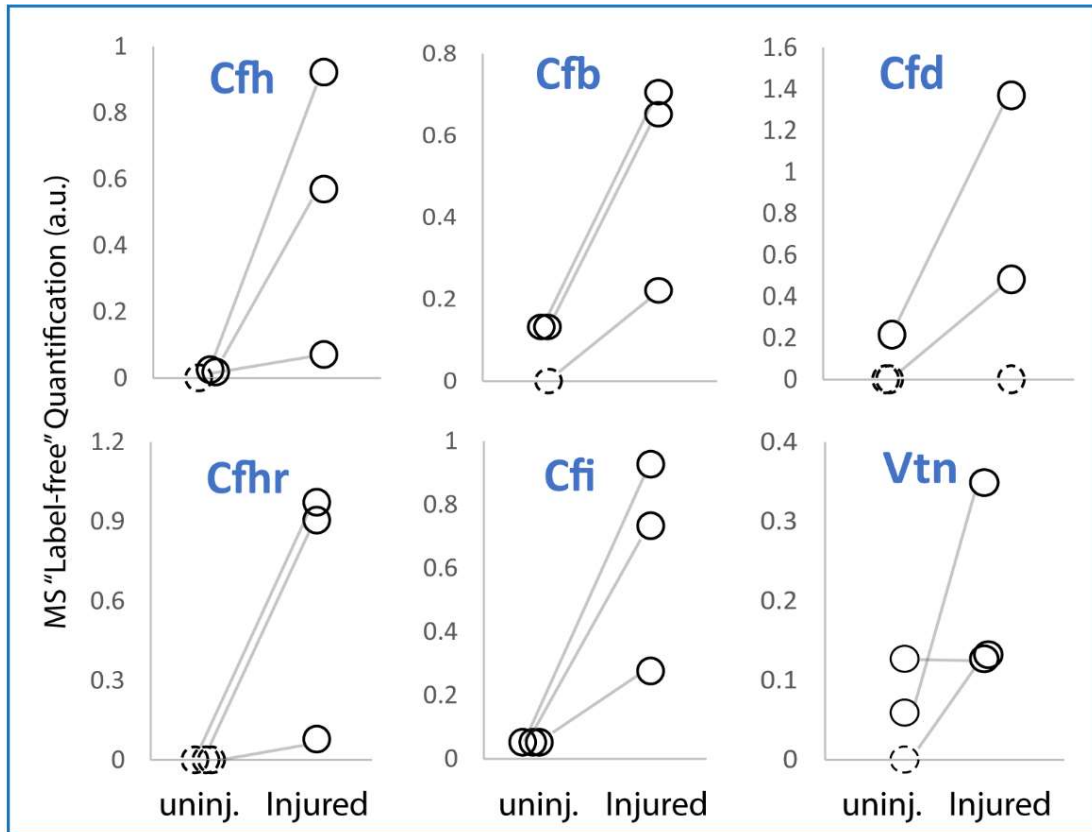

**Fig. S7. Steady state levels of CRegs between uninjured and injured eyes as measured by label-free MS quantification** (y-axis. Solid circle: data obtained; broken circle: protein was not detected and was arbitrarily assigned a zero value).



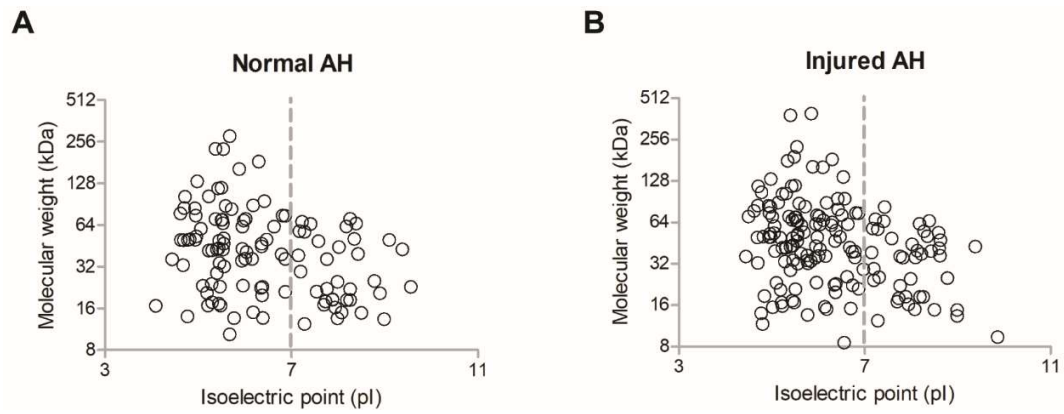

**Fig. S8.** Molecular weight and isoelectric point distribution of BAB permeable proteins in uninjured (A) and injured (B) eyes.

**Table S1. The most abundant aqueous proteins measured by MS.** Quantification of individual proteins was based on label-free NSAF indices.

| <b>Abundant AH Proteins</b>   | <b>Function</b>            |
|-------------------------------|----------------------------|
| Albumin                       | Carrier protein            |
| Transferrin                   | Carrier protein            |
| Aphrodisin                    | Aphrodisiac pheromone      |
| Odorant-binding protein IB    | Response to stimulus       |
| Alpha-2-HS-glycoprotein       | Involve in differentiation |
| Cystatin-C                    | Proteinases inhibitor      |
| Hemoglobin subunit alpha      | Oxygen transport           |
| Vitamine D-binding protein    | Carrier protein            |
| Prostaglandin-H2 D-isomerase  | Prostaglandin D2 synthase  |
| Apolipoprotein                | Transporter                |
| Crystallin                    | Lens and cornea protein    |
| Glutathione S-transferase     | Oxidation/reduction        |
| Retinoschisin                 | Maintain retina structure  |
| Clusterin                     | Extracellular chaperon     |
| Serine protease inhibitor A3K | Proteinases inhibitor      |

## References

1. Elias JE & Gygi SP (2007) Target-decoy search strategy for increased confidence in large-scale protein identifications by mass spectrometry. *Nat Methods* 4(3):207-214.
2. Savas JN, *et al.* (2017) Amyloid Accumulation Drives Proteome-wide Alterations in Mouse Models of Alzheimer's Disease-like Pathology. *Cell Rep* 21(9):2614-2627.
3. Park SK, Venable JD, Xu T, & Yates JR, 3rd (2008) A quantitative analysis software tool for mass spectrometry-based proteomics. *Nat Methods* 5(4):319-322.
4. Feng L, Chen H, Suyeoka G, & Liu X (2013) A laser-induced mouse model of chronic ocular hypertension to characterize visual defects. *J Vis Exp* (78).
5. Anderson C, Zhou Q, & Wang S (2014) An alkali-burn injury model of corneal neovascularization in the mouse. *J Vis Exp* (86).
6. Thomson BR, *et al.* (2014) A lymphatic defect causes ocular hypertension and glaucoma in mice. *J Clin Invest* 124(10):4320-4324.
7. Souma T, *et al.* (2016) Angiopoietin receptor TEK mutations underlie primary congenital glaucoma with variable expressivity. *J Clin Invest* 126(7):2575-2587.
